# Supplementary material for: Insulin and β-adrenergic receptors mediate lipolytic and anti-lipolytic signalling that is not altered by type 2 diabetes in human adipocytes
Source: PubMed Central journal article supplement — Biochem J. 2019 Oct 11;476(19):2883–908. doi: 10.1042/BCJ20190594 (PMC6792037; doi:10.1042/bcj20190594), 2019-10-11
Supplement: BCJ-476-2883-s1.pdf [file BCJ-476-2883-s1.pdf]

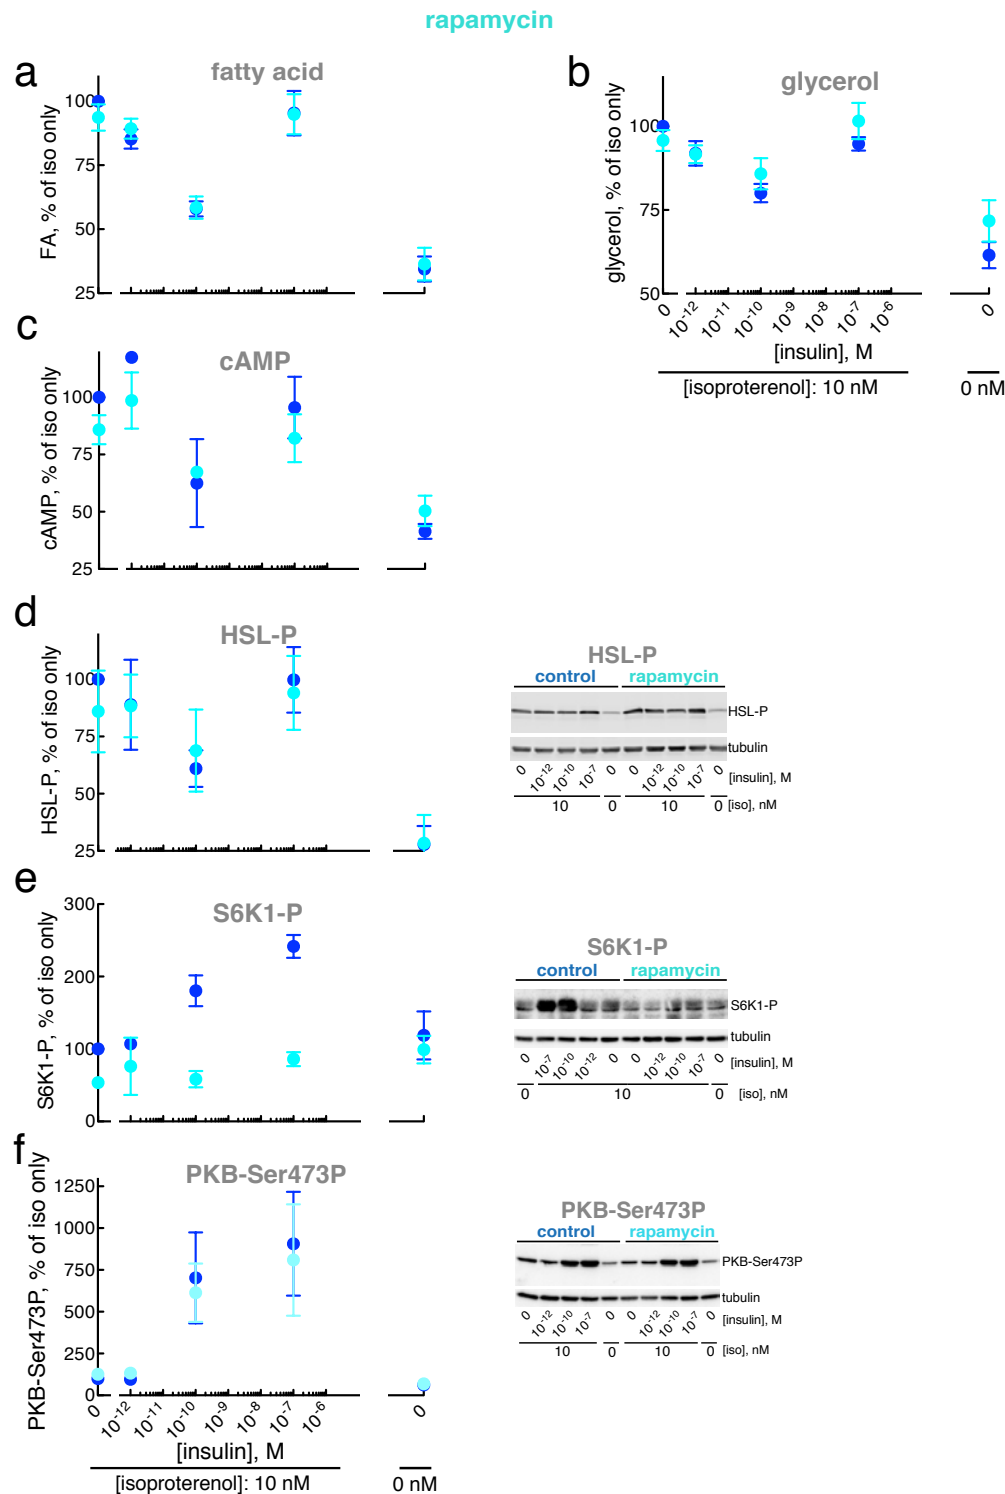

**Inhibition of mTORC1 does not affect control of lipolysis by isoproterenol or insulin.**

Adipocytes were pre-incubated without (blue) or with 50 nM rapamycin (cyan) for 60 min, when indicated concentration of insulin was added and cells incubated for 15 min before incubation with 10 nM isoproterenol (iso) for another 10 min. Cells were then separated from medium and fatty acids ( $n=7$ ) (a) and glycerol ( $n=7$ ) (b) were determined in the medium. cAMP ( $n=3$ ) (c) and the phosphorylation of HSL ( $n=4$ ) (d), S6K1 ( $n=3$ ) (e) and PKB at Ser<sup>473</sup> ( $n=4$ ) (f) were determined in the cells. Representative immunoblots of one experiment are shown.

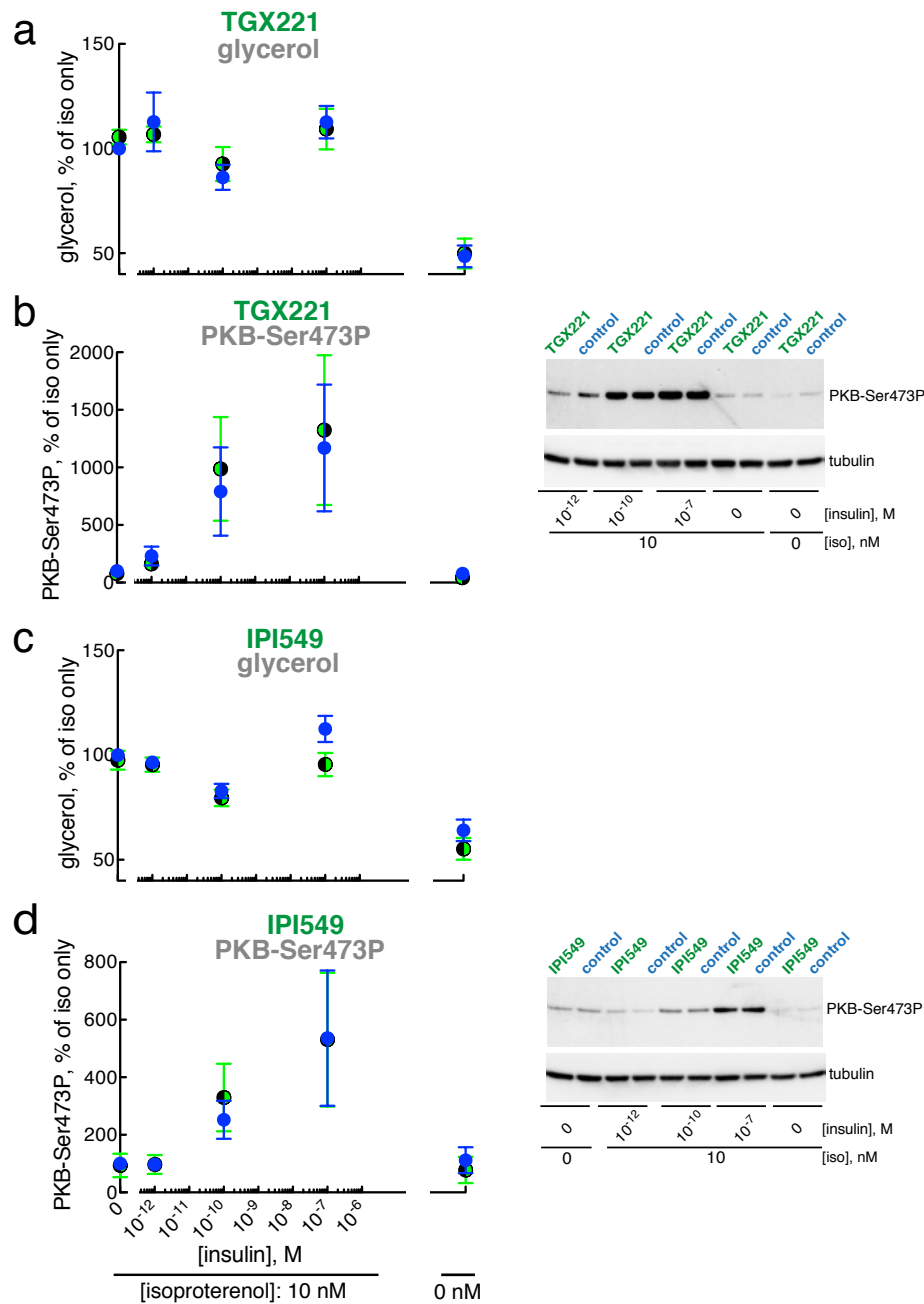

**Effect of PI3K-inhibitors TGX221 and IPI549 on lipolysis.**

Adipocytes were pre-incubated without (blue) or with inhibitors of PI3K (green/black) for 30 min: 10  $\mu$ M TGX221 (inhibitor of PI3K $\beta$ ) ( $n=4$ ) (a,b) or 1  $\mu$ M IPI549 (inhibitor of PI3K $\gamma$ ) ( $n=4$ ) (c,d). Then the indicated concentration of insulin was added and cells incubated for 15 min before incubation with 10 nM isoproterenol (iso) for another 10 min. Cells were then separated from medium and glycerol released to the medium (a,c) and the phosphorylation of PKB at Ser<sup>473</sup> (b,d) in the cells were determined. Representative immunoblots of one experiment are shown.

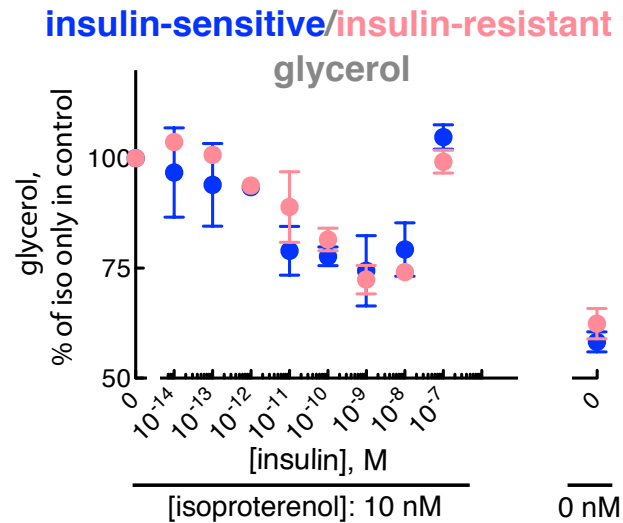

**Control of lipolysis in insulin-sensitive and insulin-resistant non-diabetic non-obese control subjects.**

Adipocytes from non-diabetic insulin sensitive subjects (HOMA-IR average 0.91, range 0.33-1.45; QUICKI average 0.40, range 0.36-0.47) ( $n=22$ , blue symbols) or from non-diabetic insulin resistant subjects (HOMA-IR average 3.20, range 2.24-5.00; QUICKI average 0.32, range 0.30-0.34) ( $n=17$ , pink symbols). The cells were incubated with the indicated concentration of insulin for 15 min, when 10 nM isoproterenol was added and cells incubated for another 10 min. Cells were then separated from medium and glycerol was determined in the medium.

**Clinical data of subjects (female) analysed in Figure 14.**

Blood was sampled after overnight fasting and values refer to concentration in plasma or serum (insulin). g, glycerol; f, fatty acid; h, HSL phosphorylation; c, cAMP; p, HSL protein.

BMI, body mass index; TAG, triacylglycerol; chol, cholesterol; LDL, low density lipoprotein; HDL, high density lipoprotein.

**a. Non-obese, non-diabetic subjects**

| subject # | analyses | age years | BMI kg/m <sup>2</sup> | TAG mM | chol mM | LDLchol mM | HDLchol mM | glucose mM | insulin mIU/L |
|-----------|----------|-----------|-----------------------|--------|---------|------------|------------|------------|---------------|
| 1         | g,h      | 46        | 24                    | 0.94   | 4       | 2.5        | 1.1        | 5.7        | 5.6           |
| 2         | g,f,h    | 74        | 28                    | 1.8    | 6.8     | 4.1        | 1.8        | 6.8        | 11            |
| 3         | g,f,h    | 53        | 24                    | 1.1    | 4.5     | 2.3        | 1.7        | 5.6        | 5.5           |
| 4         | g,f,h    | 86        | 25                    | 1.2    | 3.1     | 1.8        | 0.76       | 7.1        | 3.5           |
| 5         | g,f,h    | 66        | 24                    | 0.54   | 4.1     | 2.1        | 1.7        | 4.9        | 2.0           |
| 6         | f,h      | 63        | 27                    | 2.9    | 5.2     | 2.4        | 1.6        | 6.8        | 13            |
| 7         | f        | 78        | 23                    | 1.2    | 6       | 3.7        | 1.7        | 7.5        | 4.9           |
| 8         | g,f,h    | 62        | 18                    | 0.99   | 2.6     | 1.6        | 0.52       | 7.3        | 6.9           |
| 9         | h        | 44        | 26                    | 2.2    | 4.7     | 2.2        | 1.5        | 5.0        | 3.5           |
| 10        | h        | 81        | 27                    | 1.1    | 4.4     | 2.8        | 1.2        | 5.6        | 4.4           |
| 11        | c        | 75        | 29                    | 2.8    | 4.1     | 1.8        | 1.1        | 8.7        | 22            |
| 12        | c        | 69        | 28                    | 3      | 5.2     | 3.1        | 0.82       | 6.2        | 2.3           |
| 13        | c        | 65        | 20                    | 1.1    | 5.4     | 3.2        | 1.7        | 5          | 1.9           |
| 14        | c        | 71        | 23                    | 1.4    | 6.5     | 4.3        | 1.6        | 6.5        | 5.4           |
| 15        | c        | 78        | 28                    | 1.0    | 5.8     | 4.2        | 1.1        | 6.3        | 10            |
| 16        | c        | 60        | 22                    | 3.0    | 6.6     | 4.2        | 1.1        | 6.1        | 14            |
| 17        | c        | 40        | 28                    | 0.92   | 3.1     | 1.8        | 0.82       | 5.3        | 4.7           |
| 18        | p        | 71        | 22                    | 1.5    | 3.2     | 1.7        | 0.83       | 5.4        | 1.9           |
| 19        | p        | 65        | 28                    | 2.5    | 3.7     | 1.0        | 1.5        | 6.6        | 5.5           |
| 20        | p        | 73        | 20                    | 1.0    | 4.0     | 2.1        | 1.4        | 7.6        | 2.4           |
| 21        | p        | 44        | 20                    | 0.79   | 2.6     | 1.0        | 1.3        | 6.8        | 6.2           |
| 22        | p        | 47        | 21                    | 5.3    | 4.2     | -          | 0.56       | 4.8        | 2.4           |
| 23        | p        | 45        | 21                    | 1.1    | 4.1     | 2.2        | 1.4        | 5.8        | 3.6           |
| 24        | p        | 49        | 26                    | 1.6    | 3.5     | 1.3        | 1.4        | 6.8        | 9.1           |
| 25        | p        | 49        | 28                    | 0.88   | 4.2     | 2.3        | 1.5        | 5.8        | 3.9           |
| 26        | p        | 47        | 25                    | 1.0    | 4.5     | 3.3        | 0.77       | 4.9        | 2.4           |
| 27        | p        | 34        | 26                    | 1.2    | 4.3     | 2.4        | 1.3        | 5.1        | 1.6           |

**b. Obese, diabetic subjects**

| subject # | analyses  | age years | BMI kg/m <sup>2</sup> | TAG mM | chol mM | LDLchol mM | HDLchol mM | glucose mM | insulin mIU/L | diabetes-treatment       |
|-----------|-----------|-----------|-----------------------|--------|---------|------------|------------|------------|---------------|--------------------------|
| 1         | g,f,h     | 70        | 36                    | 2.1    | 6       | 4.0        | 1.1        | 8.4        | 69            | metformin                |
| 2         | g,f,h,c   | 45        | 32                    | 4.1    | 4.8     | -          | 0.8        | 7          | 5.9           | diet                     |
| 3         | g,f,h,c   | 75        | 31                    | 1.6    | 2.5     | 1.0        | 0.8        | 9          | 12            | metformin                |
| 4         | g,f,h,c   | 68        | 28                    | 1.7    | 3.6     | 1.6        | 1.2        | 6.3        | 6.7           | metformin                |
| 5         | g,f,h,c   | 77        | 28                    | 2.7    | 5.9     | 3.7        | 1.0        | 9.5        | 10            | metformin                |
| 6         | g,f,h,c,p | 71        | 40                    | 4.1    | 4.6     | -          | 0.9        | 12.3       | 30            | insulin                  |
| 7         | g,f,h,c,p | 65        | 33                    | 2.8    | 4.3     | 1.8        | 1.2        | 11.8       | 17            | glipizide<br>metformin   |
| 8         | c,p       | 61        | 35                    | 2.2    | 2.7     | 1.1        | 0.7        | 5.4        | 13            | dulaglutide<br>metformin |
| 9         | c,p       | 83        | 36                    | 1.4    | 3.0     | 1.4        | 1.0        | 10         | 6.0           | glipizide<br>sitagliptin |
| 10        | c,p       | 66        | 38                    | 3.5    | 5.2     | 2.8        | 0.8        | 10.7       | 39            | sitagliptin              |
| 11        | c,p       | 75        | 35                    | 2.4    | 2.8     | 0.8        | 1.0        | 6.5        | 6.8           | diet                     |
| 12        | p         | 65        | 37                    | 2.7    | 5.7     | 3.5        | 1.0        | 10.4       | 173           | -                        |
| 13        | p         | 45        | 38                    | 1.2    | 4.6     | 3.2        | 0.9        | 6.4        | 8.7           | -                        |
| 14        | p         | 72        | 31                    | 2.4    | 3.1     | 0.8        | 1.1        | 7.6        | 7.2           | -                        |
| 15        | p         | 65        | 43                    | 2.7    | 4.5     | 2.4        | 0.9        | 8.5        | 15            | -                        |

**Characteristics of subjects (female) analysed in Figure S3.**

|                              | insulin sensitive ( <i>n</i> =22) |              | insulin resistant ( <i>n</i> =17) |              |
|------------------------------|-----------------------------------|--------------|-----------------------------------|--------------|
|                              | <i>mean</i>                       | <i>range</i> | <i>mean</i>                       | <i>range</i> |
| <b>age, years</b>            | 59                                | 30-86        | 66                                | 43-80        |
| <b>BMI, kg/m<sup>2</sup></b> | 23                                | 18-27        | 24                                | 18-28        |
| <b>QUICKI</b>                | 0.40                              | 0.36-0.47    | 0.32                              | 0.30-0.34    |
| <b>HOMA-IR</b>               | 0.91                              | 0.33-1.45    | 3.20                              | 2.24-5.00    |
